# Supplementary material for: Inflammatory Tendencies and Overproduction of IL-17 in the Colon of Young NOD Mice Are Counteracted With Diet Change
Source: PubMed Central journal article supplement — Diabetes. 2010 Jun 14;59(9):2237–46. doi: 10.2337/db10-0147 (PMC2927946; doi:10.2337/db10-0147), 2010-06-14
Supplement: supp_db10-0147_db100147onlineappenidx.pdf [file supp_db10-0147_db100147onlineappenidx.pdf]

## ONLINE APPENDIX

**Supplemental Table 1. Sense and antisense primer sequences for real time PCR measurements.**

| Gene         | Primer name |           | Sequence (5'→ 3')         |
|--------------|-------------|-----------|---------------------------|
| GADPH        | GADPH-s     | sense     | AACGACCCCTTCATTGAC        |
|              | GADPH-a     | antisense | TCCACGACATACTCAGCAC       |
| IL17         | IL17-s      | sense     | TCCCTCTGTGATCTGGGAAG      |
|              | IL17-a      | antisense | CTCGACCCTGAAAGTGAAGG      |
| IFN $\gamma$ | INF-s       | sense     | AACGCTACACACTGCATCT       |
|              | INF-a       | antisense | GAGCTCATTGAATGCTTGG       |
| IL10         | IL10-s      | sense     | AGGGCCCTTTGCTATGGTGT      |
|              | IL10-a      | antisense | TGGCCACAGTTTTTCAGGGAT     |
| TGF $\beta$  | TGF-s       | sense     | GACCGCAACAACGCCATCTA      |
|              | TGF-a       | antisense | AGCCCTGTATTCCGTCTCCTT     |
| Foxp3        | FoxP3-s     | sense     | GGCCCTTCTCCAGGACAGA       |
|              | FoxP3-a     | antisense | GCTGATCATGGCTGGGTTGT      |
| IL23p19      | IL23p19-s   | sense     | TGGCATCGAGAAACTGTGAGA     |
|              | IL23p19-a   | antisense | TCAGTTCGTATTGGTAGTCCTGTTA |
